# Supplementary material for: Chemical synthesis of PEDOT nanofibers
Source: Royal Society of Chemistry journal article supplement (doi:10.1039/b511290g), 2005-01-01
Supplement: b511290g.pdf [file b511290g.pdf]

## Electronic Supplementary Information

### Chemical Synthesis of PEDOT Nanofibers

Xinyu Zhang and Sanjeev K. Manohar\*

*Department of Chemistry, Alan G. MacDiarmid Center for Innovation,  
The University of Texas at Dallas, Richardson, TX 75080.  
Fax: 972-883-6586; Tel:-972-883-6536; E-mail: [sanjeev.manohar@utdallas.edu](mailto:sanjeev.manohar@utdallas.edu)*

#### Synthesis of PEDOT Nanofibers:

Synthesis and purification: All chemicals were of analytical grade and used as purchased. EDOT monomer (7.0 mmol) was added to 50 ml of a magnetically stirred solution of aq. 1.0M CSA containing 1.0 ml V<sub>2</sub>O<sub>5</sub> sol-gel. After complete dissolution of EDOT, 10 ml of a solution of (NH<sub>4</sub>)<sub>2</sub>S<sub>2</sub>O<sub>8</sub> (5.0 mmol) in aq. 1.0M CSA was added to initiate the polymerization. The polymerization was monitored by potential-time profiling using Pt wire as the electrode and SCE reference. The solution immediately turned dark blue and after 5 h the black precipitate of PEDOT nanofibers having 100-180 nm diameter was suction filtered and dried under dynamic vacuum at 80°C for 12 h to yield ~600 mg of PEDOT nanofibers (95% yield) having conductivity  $\sigma_{RT}$  ~16 S/cm (pressed pellet). The control experiment was carried out without addition of V<sub>2</sub>O<sub>5</sub> nanofibers. Films of PEDOT on PET can be obtained by placing strips (2 x 5 cm) of PET in aq. 1.0M CSA prior to addition of monomer.
